# Supplementary material for: Attitude towards healthy nutrition and mental toughness: a study of taekwondo athletes
Source: PeerJ. 2024 Mar 29;12:e17174. doi: 10.7717/peerj.17174 (PMC10984172; doi:10.7717/peerj.17174)
Supplement: Supplemental Information 2 [file peerj-12-17174-s002.xls]

## Sheet: data
number	female=1	male= 2	age	Nutrition question 1	Nutrition question 2	Nutrition question 3	Nutrition question 4	Nutrition question 5	Nutrition question 6	Nutrition question 7	Nutrition question 8	Nutrition question 9	Nutrition question 10	Nutrition question 11	Nutrition question 12	Nutrition question 13	Nutrition question 14	Nutrition question 15	Nutrition question 16	Nutrition question 17	Nutrition question 18	Nutrition question 19	Nutrition question 20	Nutrition question 21	MT question 1	MT question 2	MT question 3	MT question 4	MT question 5	MT question 6	MT question 7	MT question 8	MT question 9	MT question 10	MT question 11
1	1		23	5	5	5	5	5	4	3	2	2	2	1	5	5	5	3	5	1	4	1	1	1	5	4	5	5	4	4	5	5	5	5	5
2	1		20	5	3	5	5	5	3	3	1	3	1	3	3	5	3	5	5	3	3	1	1	1	5	3	5	5	3	5	3	5	5	5	5
3	1		16	5	5	5	5	5	4	4	1	2	1	5	3	5	5	5	5	3	1	1	1	1	5	5	5	5	5	5	5	5	5	5	5
4	1		16	4	5	5	5	3	3	1	1	1	1	4	5	4	4	5	5	1	1	1	1	1	5	5	5	5	5	5	5	5	5	1	5
5		2	42	5	3	5	5	5	3	3	1	3	3	3	5	5	5	3	3	1	1	1	5	3	3	3	5	5	3	5	3	5	5	5	5
6		2	11	5	5	5	5	5	4	3	4	4	1	5	4	5	5	5	5	5	1	2	5	5	5	4	5	3	5	4	2	5	3	5	4
7	1		16	2	3	4	3	3	4	2	3	3	3	2	5	3	4	2	4	3	3	5	5	3	3	2	4	5	2	5	5	2	3	4	3
8		2	11	5	5	5	5	5	4	4	3	3	5	1	5	5	5	5	4	3	1	3	4	3	4	1	3	1	3	1	5	5	5	3	1
9		2	12	1	3	5	1	4	2	1	3	5	2	4	2	3	5	4	2	1	3	1	3	5	3	5	1	3	1	2	3	2	5	3	1
10	1		10	5	1	2	4	5	1	2	2	2	4	3	2	1	2	3	1	1	1	1	1	1	1	2	3	2	1	4	2	3	1	1	2
11		2	17	5	4	3	3	2	5	4	3	4	3	4	3	2	3	4	5	4	4	4	3	3	5	4	4	4	3	4	3	5	5	5	5
12		2	12	5	4	5	4	3	4	2	3	1	2	4	3	4	5	3	2	3	1	2	3	2	4	5	4	3	4	2	3	2	5	1	3
13	1		11	5	4	4	4	5	4	4	3	2	5	3	5	4	4	3	4	1	3	2	1	2	5	4	3	4	4	5	3	5	5	5	5
14	1		11	5	5	4	4	5	3	4	1	2	1	5	5	5	4	5	4	1	2	1	1	3	5	5	3	3	5	5	4	5	4	5	5
15		2	10	5	4	4	4	5	4	4	3	2	3	4	1	1	1	1	3	2	4	2	2	3	2	2	3	2	3	3	2	2	2	2	2
16	1		10	1	4	5	4	5	2	2	1	1	1	1	5	4	4	4	5	1	1	2	3	1	5	5	4	5	5	5	4	5	5	2	5
17		2	17	5	5	5	5	5	5	2	2	2	1	5	5	5	4	5	5	1	1	1	1	1	5	5	5	5	5	5	5	5	5	5	5
18	1		11	5	5	5	4	4	3	3	3	3	1	3	4	3	3	5	4	1	2	2	3	2	3	3	3	3	3	3	3	4	3	3	3
19		2	10	5	5	5	5	5	5	5	5	5	5	5	5	5	5	5	5	5	5	5	5	5	5	5	5	5	5	5	5	5	5	5	5
20		2	10	5	5	5	5	5	2	2	2	2	2	2	5	5	5	5	5	2	1	1	1	1	5	5	5	5	2	2	5	5	5	5	5
21		2	10	5	5	5	5	5	2	2	5	5	2	5	5	5	3	2	5	3	2	2	2	2	3	5	5	2	5	5	2	5	5	5	2
22	1		14	5	4	4	4	5	5	5	3	5	1	5	3	4	3	4	3	1	3	2	3	2	3	4	3	3	4	4	3	4	4	3	4
23	1		12	5	4	4	4	5	3	3	3	2	1	2	5	5	4	4	4	1	1	1	1	2	4	4	4	5	4	4	3	5	4	3	4
24		2	10	5	5	4	5	5	3	1	4	4	5	5	5	5	5	5	5	1	4	1	1	1	5	5	5	5	5	5	5	5	5	5	5
25		2	13	4	4	4	4	5	3	3	2	3	1	1	4	4	3	5	4	2	2	5	3	2	5	3	3	4	4	5	3	5	4	3	4
26		2	13	5	4	4	4	4	5	5	4	4	1	5	4	4	3	3	4	1	4	4	3	2	5	3	3	4	4	5	3	5	4	3	4
27	1		16	5	5	5	5	5	5	5	4	5	1	5	1	3	2	3	2	5	3	2	3	3	5	3	3	4	3	5	3	5	5	3	3
28		2	13	4	4	4	4	5	3	3	2	2	4	2	5	3	3	3	4	2	1	1	2	2	5	4	3	4	4	5	3	4	4	3	4
29	1		11	5	4	5	3	5	5	5	1	3	3	3	5	4	4	3	5	1	3	3	2	1	5	5	5	5	5	5	4	5	4	3	5
30	1		12	5	4	5	5	5	5	3	1	3	1	3	5	5	5	5	5	1	3	1	1	1	5	5	5	5	5	4	5	5	5	3	5
31		2	14	4	4	4	5	5	3	4	2	3	1	5	4	5	4	5	5	1	2	3	2	4	5	3	3	4	4	4	3	5	4	3	4
32	1		11	5	5	4	5	5	4	1	1	2	1	5	5	5	4	5	5	1	4	1	1	5	4	5	3	5	5	5	3	5	5	4	5
33	1		11	5	3	3	3	5	5	3	5	2	1	3	5	3	3	5	4	1	5	5	5	2	3	4	3	4	4	5	3	5	4	3	4
34	1		10	5	5	4	5	5	3	3	2	3	1	2	5	5	5	5	5	1	1	1	1	1	5	3	4	5	5	5	4	5	5	3	5
35		2	23	5	4	3	5	5	4	3	3	3	1	5	4	3	3	4	4	3	4	3	4	5	5	4	4	4	5	4	4	4	5	5	4
36		2	11	1	2	1	1	1	2	2	1	3	2	1	1	1	1	1	1	2	2	2	2	2	1	1	1	1	1	1	4	1	1	1	1
37	1		15	1	3	2	4	2	5	5	5	2	2	3	2	4	1	2	2	4	2	3	3	1	3	3	2	1	3	1	3	4	4	2	3
38		2	14	3	4	2	3	4	5	2	3	4	2	3	3	3	3	5	2	1	1	3	5	2	5	2	4	4	2	3	2	4	4	3	3
39	1		13	1	3	2	5	3	4	2	4	3	5	2	4	3	5	5	5	5	3	3	2	1	3	4	3	1	3	3	2	4	5	2	4
40		2	18	1	1	2	1	3	1	2	2	2	1	2	1	1	1	1	1	1	2	2	2	2	1	1	1	1	1	1	1	1	1	1	1
41	1		10	4	4	5	4	4	3	3	1	3	1	1	4	5	3	5	4	1	3	1	1	1	2	2	3	1	5	5	3	5	4	3	5
42		2	16	5	5	5	5	5	3	4	5	4	1	3	5	5	5	5	1	3	5	1	2	5	5	5	5	5	5	5	1	5	5	5	5
43		2	16	4	4	5	5	5	4	5	3	5	5	5	5	3	4	3	3	1	1	1	1	1	4	4	3	4	5	4	3	3	4	2	5
44		2	11	5	5	5	5	5	3	4	4	4	3	5	5	5	3	5	5	1	3	3	1	2	5	5	5	3	5	5	3	5	5	5	5
45	1		16	5	5	5	5	5	5	5	1	5	1	5	1	1	1	1	1	1	1	1	1	1	1	1	1	1	1	1	1	1	1	1	1
46		2	19	4	4	4	5	5	5	4	4	4	4	4	5	5	5	5	5	5	4	4	4	5	4	5	4	5	4	5	5	5	5	5	5
47		2	19	5	5	5	5	5	5	5	5	5	5	5	5	5	5	5	5	5	5	5	5	5	5	4	4	5	4	5	4	4	4	5	5
48		2	46	5	5	5	5	5	1	1	2	2	5	3	5	5	5	5	5	5	1	1	1	1	5	5	5	5	5	5	5	5	5	5	5
49	1		20	5	5	5	5	5	3	4	4	3	1	3	4	4	5	3	4	3	3	4	4	2	5	5	3	4	2	3	3	4	3	4	4
50	1		18	5	5	5	4	5	4	5	3	5	4	5	5	4	5	3	4	5	4	5	4	5	4	5	4	5	3	5	5	3	4	5	4
51		2	18	5	5	5	4	5	3	3	5	4	5	3	4	3	5	4	5	3	4	5	3	4	5	4	5	4	5	3	5	5	4	4	3
52	1		18	5	5	5	5	5	3	5	5	5	1	5	5	5	5	5	5	1	3	3	1	1	5	5	5	5	5	5	5	5	5	5	5
53		2	19	3	4	4	4	3	4	5	3	4	3	5	4	3	4	3	4	4	5	3	4	4	3	3	3	4	4	5	5	4	4	3	5
54		2	20	4	3	4	5	3	4	5	3	4	4	5	3	5	4	3	4	5	4	3	5	3	4	4	5	5	3	5	4	5	4	4	5
55		2	17	4	4	3	4	5	5	5	5	1	1	1	5	5	5	5	3	1	1	1	1	1	5	5	5	5	5	5	5	5	4	3	1
56		2	16	5	4	5	3	5	2	2	4	3	5	5	4	3	1	1	4	5	4	3	1	1	5	5	4	3	2	3	4	3	5	5	1
57	1		17	5	4	3	5	5	4	4	3	2	4	3	5	3	5	5	4	3	4	4	4	4	3	5	3	5	3	3	2	4	4	4	5
58	1		17	5	5	3	4	4	3	3	5	4	4	5	5	4	4	4	5	5	3	3	4	3	5	3	5	5	5	5	4	3	3	4	4
59		2	16	2	3	3	4	3	5	4	4	5	4	4	3	5	3	2	3	4	3	4	5	5	4	4	3	5	3	2	3	2	3	3	4
60	1		14	4	4	4	4	4	3	3	3	3	4	3	4	3	2	3	3	2	2	3	4	5	3	4	1	2	3	4	3	3	2	4	5
61	1		17	4	3	2	4	5	3	5	3	4	4	4	5	4	3	4	5	3	4	2	3	2	3	3	3	4	5	5	5	4	4	3	5
62	1		15	5	2	4	5	3	2	4	2	3	4	5	4	3	5	5	3	4	4	3	3	4	3	4	4	2	3	3	2	3	3	3	5
63	1		19	4	4	3	5	3	3	4	2	3	3	4	4	5	4	3	3	4	3	4	5	4	3	3	2	4	3	2	3	3	4	4	3
64		2	19	5	4	4	5	5	4	3	5	5	4	5	4	4	5	3	4	5	4	4	3	3	5	5	4	4	3	4	5	4	4	4	5
65	1		18	5	5	5	4	5	5	5	5	3	3	5	3	3	3	2	3	4	5	3	4	2	5	5	5	5	4	4	4	5	5	5	5
66	1		23	5	5	5	5	5	5	5	5	5	5	5	5	1	1	2	3	3	4	1	5	5	5	5	1	2	2	1	5	1	5	5	5
67	1		17	5	5	5	5	5	3	1	1	1	1	2	5	5	5	5	5	1	1	2	1	1	5	5	5	5	5	5	5	5	5	5	5
68		2	13	5	4	4	4	3	4	4	3	3	1	3	4	5	4	4	4	5	2	1	2	3	5	4	4	4	5	5	5	4	4	5	5
69	1		13	5	5	5	5	5	4	3	1	3	1	5	5	3	5	5	5	1	3	1	2	4	5	5	5	5	5	5	5	5	5	3	5
70		2	13	5	5	4	5	5	2	1	3	1	1	2	5	4	5	5	5	1	1	1	2	3	5	5	4	5	5	4	4	5	5	4	5
71		2	13	4	3	3	4	3	2	2	1	2	3	3	5	4	3	3	3	1	2	1	2	2	4	4	3	4	3	3	3	4	4	4	4
72	1		11	2	4	2	2	5	1	1	1	1	5	1	5	5	5	3	5	5	1	5	2	5	5	1	3	3	5	3	1	3	4	4	5
73		2	16	5	5	5	5	5	5	5	5	5	5	5	5	5	5	5	5	5	5	5	5	5	5	5	5	5	5	5	5	5	5	5	5
74		2	13	5	4	4	5	5	4	4	1	3	3	3	4	1	2	3	4	3	3	2	4	3	3	4	3	4	5	5	5	5	5	2	3
75		2	12	5	5	5	5	5	4	4	1	3	2	4	5	2	4	5	5	1	3	1	1	1	5	5	4	5	5	5	5	5	5	2	5
76	1		14	5	5	5	5	5	5	4	2	2	5	5	4	5	5	5	3	4	1	1	1	2	3	4	4	4	4	4	4	5	4	3	4
77	1		14	3	4	4	3	5	5	5	4	2	3	4	2	5	3	4	4	5	3	3	5	4	1	4	3	5	3	3	5	5	4	3	5
78		2	13	4	4	4	4	4	3	3	3	3	1	3	4	5	4	4	4	4	4	4	4	4	4	4	5	4	3	4	5	4	4	5	4
79	1		14	4	4	4	4	4	3	3	2	2	2	3	4	3	3	3	4	2	2	1	2	2	3	4	4	4	4	4	4	4	4	3	4
80	1		13	5	4	4	5	5	4	5	3	4	2	5	4	4	4	4	5	2	3	4	4	2	4	5	5	5	5	4	4	5	5	4	5
81		2	12	5	3	3	5	5	1	1	2	2	5	3	3	4	3	3	5	1	1	1	1	1	5	5	4	3	4	5	2	3	3	5	4
82		2	60	5	4	3	3	5	2	1	2	1	3	3	4	5	5	5	4	4	1	1	1	1	3	5	5	5	5	3	5	5	5	5	5
83		2	30	5	5	5	5	5	4	3	4	3	1	4	3	2	3	4	4	3	3	5	5	3	5	5	5	5	5	5	5	5	5	4	5
84		2	10	5	4	4	5	2	3	2	3	2	3	3	3	3	3	2	2	1	3	5	2	4	5	5	5	5	5	5	5	5	5	5	5
85		2	11	5	4	2	3	5	1	3	3	3	2	3	1	2	1	1	1	2	2	3	5	1	3	2	5	3	1	4	1	2	4	2	5
86		2	51	2	3	2	3	4	4	4	4	5	5	5	4	4	4	5	4	5	5	4	4	5	5	4	5	4	4	5	4	4	4	4	4
87		2	55	1	2	5	4	4	3	3	4	3	2	2	3	4	4	3	3	3	4	4	4	3	3	3	3	4	4	4	3	4	4	3	3
88		2	50	5	4	3	4	5	2	4	4	5	2	3	4	4	4	4	3	2	3	1	2	3	4	4	4	4	4	4	3	5	5	4	4
89		2	50	1	5	4	3	4	4	5	4	3	4	4	3	3	4	4	3	3	4	3	4	3	4	3	4	4	4	4	5	4	4	5	4
90		2	40	5	4	3	3	4	5	4	5	4	5	4	4	3	3	4	5	4	3	4	4	3	4	4	3	4	4	4	4	3	3	4	4
91	1		19	4	4	5	5	4	4	1	1	1	1	1	5	5	1	1	1	1	5	5	4	4	5	4	5	5	5	5	5	5	5	5	5
92		2	12	5	2	5	4	5	1	1	2	2	1	4	3	5	4	5	5	3	1	2	1	3	5	2	5	5	3	2	4	2	5	4	5
93		2	13	4	3	3	4	3	3	2	2	1	2	3	4	4	4	4	5	3	4	3	4	3	2	4	3	4	2	4	2	5	5	5	4
94	1		15	4	2	2	3	4	3	4	4	2	1	2	4	3	3	5	3	4	5	2	4	3	4	2	3	4	4	3	4	2	3	5	2
95	1		14	4	2	2	3	4	3	4	4	2	1	2	4	4	3	4	4	2	1	1	2	1	3	2	4	2	4	4	2	5	5	3	5
96		2	13	4	5	4	3	5	2	3	4	2	3	4	5	5	4	4	5	3	1	1	2	3	4	5	3	5	5	4	3	5	4	4	2
97		2	16	5	3	2	4	5	4	5	3	2	1	3	4	3	4	2	4	3	2	5	3	2	5	5	2	4	2	5	5	5	5	5	5
98		2	18	5	5	5	5	5	3	3	2	2	1	3	4	5	5	5	5	2	1	1	3	1	4	4	3	3	2	3	3	4	4	5	4
99		2	11	5	4	4	4	5	3	3	2	2	1	3	5	5	5	4	5	1	2	3	3	1	5	5	4	5	5	5	4	5	5	5	5
100	1		17	5	5	5	5	5	3	4	4	4	2	2	2	5	5	4	2	3	1	1	3	1	4	4	4	4	4	4	4	4	4	4	5
101	1		18	1	3	3	4	4	3	4	4	3	1	1	3	5	3	4	5	4	1	1	3	1	5	5	5	5	5	5	5	5	4	4	5
102		2	15	1	3	3	3	4	3	2	3	3	1	3	4	4	1	3	3	3	2	3	4	2	3	3	2	3	4	3	4	5	4	3	3
103	1		12	2	3	3	3	3	1	2	1	2	5	1	2	2	2	1	1	4	4	4	3	2	2	3	4	3	2	3	4	3	3	4	2
104		2	13	5	5	5	5	3	3	1	1	4	1	2	5	5	5	5	5	1	1	1	1	1	5	5	5	5	5	5	5	5	5	5	5
105		2	18	1	1	1	1	1	1	2	2	2	1	2	1	1	1	1	1	1	2	2	2	2	1	1	1	1	1	1	1	1	1	1	1
106	1		18	4	4	4	4	5	4	1	4	1	1	2	5	4	4	4	4	1	1	1	1	1	4	5	5	5	4	4	4	4	4	4	4
107		2	16	5	5	5	5	5	5	5	5	2	2	5	5	5	5	5	5	2	2	2	2	1	5	5	5	5	5	5	5	5	5	5	5
108		2	13	5	4	3	5	5	3	1	1	3	1	4	4	5	5	5	5	2	1	1	1	1	5	4	1	5	4	5	1	5	5	5	5
109		2	13	5	1	5	5	5	3	2	5	5	1	3	5	3	5	3	5	3	3	5	5	3	5	5	5	3	1	5	4	5	5	3	5
110	1		11	5	4	4	5	4	4	2	2	1	1	1	5	5	1	5	5	1	1	1	2	1	5	5	5	5	5	4	5	5	5	5	5
111	1		33	5	5	3	5	5	4	3	1	2	3	1	4	1	3	2	5	1	3	1	2	1	5	5	5	5	5	5	5	5	5	5	5
112			11	5	4	4	4	5	3	3	2	2	1	2	3	5	3	1	3	3	3	4	1	3	1	1	5	5	5	5	5	5	4	3	5
113		2	14	5	3	3	4	5	1	1	1	1	1	4	3	4	3	4	5	2	1	1	1	2	4	4	3	3	5	5	4	4	4	4	5
114	1		12	5	4	4	4	5	3	3	2	2	1	2	5	5	3	5	5	1	1	1	1	1	4	4	4	4	5	4	3	5	4	3	3
115	1		10	5	5	4	5	5	3	3	2	2	1	2	4	5	5	5	4	1	3	2	2	3	5	5	4	4	5	5	4	5	4	3	4
116		2	11	1	3	1	3	1	4	4	4	4	1	3	1	1	1	3	3	1	4	4	3	3	1	3	1	3	3	2	3	1	1	3	1
117		2	11	1	3	2	5	3	5	3	4	1	3	5	3	4	3	1	2	3	3	3	2	2	4	5	1	2	4	5	5	5	5	5	5
118		2	15	5	5	5	5	5	4	4	4	4	1	3	5	5	5	5	5	5	4	4	2	5	5	5	5	5	5	5	5	5	5	5	5
119		2	23	5	5	4	4	5	5	3	3	3	2	4	4	3	3	3	4	3	4	4	4	4	4	5	4	4	4	4	4	4	4	5	4
120	1		17	4	5	5	5	5	4	5	4	4	5	3	1	1	1	1	5	2	1	1	3	5	5	5	3	1	4	3	4	5	5	5	5
121	1		15	5	3	3	4	5	4	4	4	4	2	2	3	1	2	4	4	2	3	3	3	2	4	4	2	3	3	4	4	4	4	4	4
122	1		16	5	4	5	5	4	4	4	3	3	4	3	4	3	3	4	3	3	3	2	2	2	3	4	4	4	3	3	4	4	3	3	3
123	1		11	4	4	2	5	5	3	3	1	2	1	3	2	5	2	4	3	4	3	1	1	2	5	5	4	5	4	3	3	5	5	3	5
124		2	19	5	5	5	5	5	5	4	4	5	2	4	5	5	3	3	4	1	5	5	4	1	4	4	4	4	3	3	3	4	4	4	4
125		2	17	5	5	5	2	5	5	1	5	1	1	5	4	5	1	5	5	1	1	1	1	1	5	5	5	5	5	5	5	5	5	5	5
126	1		18	5	4	5	5	5	3	3	3	2	1	5	4	5	5	5	4	1	1	1	2	2	5	4	5	4	5	5	5	5	5	3	5
127		2	13	5	5	5	5	4	5	5	4	4	1	4	4	4	3	4	4	1	4	4	3	3	5	4	3	4	4	4	1	4	3	4	3
128		2	10	1	1	1	1	1	4	4	4	2	2	4	1	1	1	1	1	1	2	2	2	2	1	1	1	1	1	1	1	1	1	1	1
129	1		16	5	4	5	5	5	2	1	1	2	1	5	5	5	4	5	3	1	3	3	1	4	5	5	4	5	5	5	4	5	4	4	5
130	1		13	5	3	4	4	5	2	2	1	4	1	1	5	3	4	5	4	1	2	1	1	1	3	4	3	3	3	5	4	4	4	4	5
131	1		11	5	5	5	5	5	3	2	2	2	1	3	5	4	5	5	4	1	2	2	1	2	5	4	3	4	5	5	4	5	4	3	4
132		2	11	5	3	1	1	3	5	5	5	4	3	2	3	3	1	1	3	1	5	2	3	2	5	5	5	5	5	5	3	5	5	5	5
133	1		19	5	5	5	5	5	5	3	2	5	4	2	2	2	3	3	1	1	2	2	4	4	5	4	2	2	1	1	1	2	1	1	5
134	1		21	5	3	4	3	4	4	3	2	2	1	2	5	5	5	5	3	1	1	2	2	1	4	3	3	2	4	4	3	4	4	4	4
135		2	15	5	5	5	5	5	4	3	4	4	5	3	5	5	5	5	5	1	3	4	1	4	5	5	5	5	5	5	3	5	5	5	5
136		2	17	5	4	5	4	4	4	3	2	5	3	2	3	4	1	1	3	5	2	2	2	3	3	3	4	4	3	4	4	5	4	4	5
137		2	16	5	4	5	4	4	4	3	2	5	3	1	3	4	1	3	5	2	2	2	3	3	3	3	4	4	3	4	4	5	4	4	5
138		2	16	5	5	5	5	4	3	3	3	1	5	5	5	4	5	5	1	1	1	1	2	5	4	3	4	4	4	5	5	5	5	5	5
139	1		11	5	4	4	3	4	2	1	1	2	2	2	4	4	4	2	4	3	2	2	1	2	4	4	5	4	4	4	5	5	5	4	5
140	1		14	5	4	4	3	4	2	1	1	2	2	2	4	4	4	2	4	3	2	2	1	2	4	4	5	4	4	4	5	5	5	4	5
141		2	11	5	4	4	3	4	2	1	1	2	2	2	4	4	4	2	4	3	2	2	1	2	4	4	5	4	4	4	5	5	5	4	5
142	1		44	5	4	4	3	4	2	1	1	2	2	2	4	4	4	2	4	3	2	2	1	2	4	4	5	4	4	4	5	5	5	4	5
143		2	15	5	4	4	3	4	2	1	1	2	2	2	4	4	4	3	2	4	3	2	2	1	2	4	4	5	4	4	4	5	5	5	5
144		2	14	5	4	4	3	4	2	1	1	2	2	2	4	4	4	2	4	3	2	2	2	1	4	4	5	4	4	4	5	5	5	4	5
145		2	12	5	5	4	4	5	5	3	5	3	5	3	5	5	4	5	5	3	3	5	1	4	4	5	4	5	5	5	5	5	5	5	5
146		2	10	5	5	4	4	5	1	4	4	1	5	4	5	5	5	5	3	2	1	1	2	1	5	5	5	5	5	5	5	5	5	5	5
147	1		11	5	5	4	4	3	3	2	1	2	2	3	5	4	3	5	3	1	2	1	1	2	5	5	3	3	4	3	5	5	4	5	4
148		2	13	4	5	2	3	5	2	2	3	4	5	3	4	2	5	5	5	4	2	3	1	4	3	5	3	5	1	4	3	4	5	3	2
149		2	17	5	5	5	5	5	3	4	2	2	1	2	1	5	2	3	1	2	1	2	5	4	4	3	5	5	4	4	4	5	5	5	5
150		2	16	5	5	5	5	5	3	2	2	4	1	3	5	5	3	3	5	1	1	1	1	1	3	4	5	5	5	5	5	5	5	5	5
151		2	16	5	5	5	5	5	5	3	2	2	1	5	5	5	1	3	4	2	5	4	1	1	3	4	2	3	4	5	5	3	3	2	1
152		2	13	5	5	5	5	5	1	1	1	1	1	3	5	5	5	5	5	5	2	5	1	1	5	5	5	4	5	5	4	4	5	5	5
153	1		11	5	5	5	3	5	3	2	1	4	3	5	2	4	3	4	2	4	5	4	3	2	5	3	5	3	3	4	3	4	5	3	5
154	1		15	4	3	4	5	5	4	3	4	5	4	5	4	5	5	5	3	2	3	4	3	5	5	4	2	2	3	4	5	5	5	3	5
155	1		16	3	5	4	5	5	4	3	4	5	4	3	4	4	4	3	3	4	5	5	5	4	3	3	4	5	4	3	4	5	5	5	5
156		2	11	5	5	5	5	5	2	1	1	1	1	1	2	5	5	5	4	1	1	1	1	5	5	5	5	5	5	5	5	5	5	4	4
157		2	10	5	5	4	3	4	3	5	4	3	4	3	2	5	3	4	3	2	4	2	4	5	3	4	3	2	5	3	4	2	4	2	5
158	1		15	5	5	5	5	5	3	1	1	1	1	1	5	5	5	5	5	1	1	1	1	1	5	5	5	5	5	5	5	5	5	5	5
159	1		13	5	4	3	5	3	5	3	4	3	2	4	3	5	4	3	4	3	5	3	4	2	4	3	4	2	4	3	5	3	4	3	5
160		2	13	5	5	4	3	5	5	2	2	2	2	2	5	5	4	5	5	5	4	4	4	3	3	4	5	4	4	4	3	3	2	3	4
161	1		17	5	5	4	5	4	3	4	4	5	4	3	4	5	5	4	4	5	4	5	4	5	5	5	4	5	4	5	3	5	2	5	4
162	1		16	5	5	4	3	2	4	3	2	4	5	3	2	4	3	4	2	5	3	2	4	3	1	3	5	2	4	3	2	4	3	4	5
163	1		13	5	5	5	5	5	4	1	1	1	1	1	5	5	5	5	5	1	1	1	1	1	5	5	5	5	5	4	5	4	5	5	5
164		2	13	5	5	5	5	5	1	1	1	1	1	1	5	5	5	4	4	5	5	4	4	5	4	4	4	5	4	4	5	5	5	4	5
165		2	14	4	5	4	4	3	4	3	5	5	2	1	3	4	5	5	4	3	4	5	5	4	2	3	4	5	4	3	4	5	5	4	5
166	1		10	5	4	3	2	4	5	3	3	4	3	2	4	2	5	2	3	4	2	3	4	2	4	3	2	4	2	5	3	2	5	3	2
167		2	13	4	5	5	5	5	5	5	5	5	4	4	4	4	5	4	5	4	5	4	5	3	3	3	3	1	1	4	4	5	5	5	5
168			12	5	1	5	5	5	5	3	1	1	1	5	5	5	5	5	4	1	1	2	1	1	5	5	5	4	5	5	5	5	4	5	5
169		2	12	4	5	5	5	4	3	5	4	3	5	4	3	5	5	4	3	3	4	5	5	5	4	4	5	4	3	5	4	5	3	3	5
170		2	11	4	5	4	5	4	4	4	4	4	4	5	3	4	5	3	3	3	4	5	4	4	5	5	4	5	4	4	4	3	4	5	4
171		2	16	4	5	5	4	5	4	4	4	4	4	5	4	4	4	4	4	5	4	4	4	4	4	4	4	4	4	5	5	5	5	5	4
172		2	10	4	5	4	4	5	5	5	5	4	4	4	4	5	5	5	5	5	3	4	4	4	4	3	4	5	3	4	3	4	5	3	5
173	1		13	5	2	4	4	3	5	5	4	5	5	4	5	5	4	3	2	4	5	5	4	3	4	5	5	5	4	4	5	5	4	3	4
174		2	18	3	4	4	5	5	4	4	4	4	5	4	5	5	5	5	5	4	4	5	5	5	5	5	4	4	4	4	4	5	4	4	5
175	1		17	5	4	5	5	5	1	1	2	2	1	2	2	5	5	5	5	1	1	2	5	5	5	5	5	5	5	5	5	5	5	5	5
176		2	16	4	4	4	4	4	5	5	5	4	5	4	4	4	4	4	4	3	3	1	3	3	3	3	3	4	2	4	4	4	4	4	4
177	1		18	1	4	2	4	1	5	5	4	5	3	4	2	4	3	2	2	4	5	5	4	4	5	4	1	5	3	5	2	5	5	1	3
178	1		18	5	5	5	5	5	4	3	1	2	1	4	4	5	4	5	4	1	5	3	1	2	4	5	4	4	4	4	5	5	5	5	5
179	1		18	5	4	5	5	5	5	5	5	5	1	5	5	5	5	5	5	5	5	5	5	4	4	3	5	5	5	5	5	5	5	5	5
180		2	18	3	4	4	4	4	2	3	3	4	2	4	5	3	3	3	3	5	5	3	5	5	4	4	4	4	4	5	5	4	4	4	5
181		2	18	3	2	1	3	1	1	4	1	4	1	5	3	5	5	5	3	3	3	2	1	2	4	3	3	3	4	4	3	5	4	3	5
182		2	18	4	2	1	4	4	4	4	4	2	1	4	4	2	2	4	2	2	3	2	3	2	4	4	4	2	4	4	2	4	4	4	5
183	1		16	5	5	5	5	5	4	2	4	3	4	4	4	4	3	3	5	1	1	1	4	1	4	4	4	4	4	5	5	5	4	4	5
184	1		18	5	2	5	3	2	5	4	3	3	5	3	5	5	1	5	5	3	5	1	1	3	5	5	3	2	5	5	5	5	5	5	5
185	1		16	5	5	5	5	5	3	3	1	3	1	4	5	5	4	5	5	1	2	5	4	1	5	5	4	5	5	5	4	5	5	4	5
186	1		18	4	4	4	3	3	4	3	3	3	1	4	1	2	3	3	3	3	3	1	1	1	5	5	3	3	5	5	4	5	5	3	5
187		2	19	4	4	5	3	5	3	3	4	4	5	5	5	4	5	5	5	3	3	2	1	3	5	5	3	3	4	5	4	5	4	5	5
188	1		20	5	4	5	3	2	4	5	5	4	3	2	4	5	4	4	4	3	4	4	2	1	1	1	3	4	3	2	5	3	4	2	2
189	1		19	5	4	3	2	5	4	4	5	3	2	1	4	3	5	2	2	2	4	5	5	5	4	5	4	5	3	4	4	4	2	5	5
190		2	22	5	4	3	5	4	3	2	4	2	5	5	4	3	2	5	4	3	2	1	4	3	3	4	5	3	2	5	4	2	5	4	5
191	1		20	5	4	3	4	5	2	4	5	3	3	4	5	3	5	4	5	3	4	5	2	2	4	5	2	5	3	2	2	5	5	3	5
192		2	21	5	3	3	5	2	4	2	3	5	4	3	2	2	4	5	3	2	4	5	3	4	2	3	4	5	5	5	2	3	5	3	4
193	1		19	1	3	4	3	5	2	1	3	4	5	3	1	3	4	2	1	5	3	5	2	3	2	1	5	4	3	5	1	3	4	2	5
194	1		19	2	4	3	5	2	5	4	5	3	2	1	5	3	4	2	4	4	5	5	5	5	3	4	2	2	4	3	5	3	5	2	5
195	1		21	1	4	5	3	2	5	4	2	4	5	3	2	5	5	2	3	5	4	5	5	5	5	4	3	3	4	2	1	2	4	5	5
196		2	21	2	1	5	3	4	1	4	5	2	4	3	2	1	5	4	3	5	3	4	2	3	2	5	4	3	1	4	2	2	5	3	2
197		2	24	5	4	3	1	2	5	3	1	2	5	5	4	3	5	2	1	5	3	2	1	5	5	3	2	1	4	3	2	4	2	4	1
198		2	17	5	5	3	4	5	3	2	4	3	2	1	4	3	5	3	2	4	5	5	5	5	3	3	2	2	4	4	2	5	4	5	5
199		2	28	5	4	5	3	3	5	5	2	3	1	2	5	2	4	2	5	1	1	3	3	1	4	2	4	5	3	2	4	5	3	5	2
200		2	24	5	4	3	5	5	4	3	3	2	1	5	4	5	5	3	5	1	1	3	3	3	5	4	5	4	3	5	3	5	4	3	5
201		2	21	5	4	3	5	3	4	3	5	4	4	5	3	2	5	1	4	2	1	4	3	5	3	4	5	3	2	5	2	3	4	5	5
202	1		24	5	3	2	5	4	2	4	5	3	4	5	3	2	5	4	5	5	3	3	3	5	3	5	2	3	2	5	4	3	2	2	4
203	1		18	5	4	3	2	1	1	2	3	4	5	5	5	5	4	4	1	3	2	3	3	4	4	4	5	3	4	5	5	4	1	3	2
204	1		18	4	2	3	5	3	2	1	4	3	3	1	5	3	2	4	2	1	1	3	4	1	5	3	1	5	4	5	2	3	5	3	5
205		2	17	4	2	3	1	1	3	4	2	1	5	3	1	4	1	4	5	2	5	2	3	5	3	1	4	3	4	1	3	5	5	1	5
206	1		18	4	5	4	1	3	1	5	4	2	1	5	4	3	2	1	5	4	3	2	5	3	2	1	4	3	5	1	4	1	5	2	1
207	1		20	3	2	1	5	4	5	3	2	5	4	3	2	5	3	2	5	3	2	1	4	5	5	1	3	1	5	4	3	2	5	5	4
208		2	20	5	4	3	5	5	4	3	3	2	1	5	4	5	5	3	5	1	1	3	3	2	5	4	5	4	3	5	3	5	4	3	5
209	1		19	5	4	3	5	5	4	3	3	2	1	5	4	5	5	3	5	1	1	3	3	2	5	4	5	4	3	5	3	5	4	3	5
210		2	17	5	4	3	5	5	4	3	3	2	1	5	4	5	5	3	5	1	1	3	3	2	5	4	5	4	3	5	3	5	4	3	5
211		2	18	5	4	3	5	5	4	3	3	2	1	5	4	5	5	3	5	1	1	3	3	5	4	5	4	3	3	5	3	5	4	3	5
212	1		15	5	4	3	5	5	4	3	3	2	1	5	4	5	5	3	5	1	1	3	3	2	5	4	5	4	3	5	3	5	4	3	5
213	1		22	5	4	3	5	5	4	3	3	2	1	5	4	5	5	3	5	1	1	3	3	3	5	4	5	4	3	5	3	5	4	3	5
214		2	25	5	4	3	5	5	4	3	3	2	1	5	4	5	5	3	5	1	1	3	3	3	5	4	5	4	3	5	3	5	4	3	5
215		2	17	3	4	2	5	5	4	5	4	3	2	5	3	4	3	2	4	3	5	2	1	3	3	5	4	5	3	5	4	3	4	2	4
216	1		29	5	4	3	5	5	4	3	3	2	1	5	4	5	5	3	5	1	1	3	3	3	5	4	5	4	3	5	3	5	4	3	5
217	1		27	5	4	3	5	5	4	3	3	2	1	5	4	5	5	3	5	1	1	3	3	3	5	4	5	4	3	5	3	5	4	3	5
218	1		17	5	4	3	5	5	4	3	3	2	1	5	4	5	5	3	5	1	1	3	3	3	5	4	5	4	3	5	3	5	4	3	5
219		2	19	5	4	5	5	4	3	3	2	1	5	4	5	5	3	5	1	1	3	3	3	5	4	4	5	4	3	5	3	5	4	3	5
220		2	28	5	4	3	5	5	4	3	3	2	1	5	4	5	5	3	5	1	1	3	3	3	5	4	5	4	3	5	3	5	4	3	5
221	1		23	5	4	3	5	5	4	3	3	2	1	5	4	5	5	3	5	1	1	3	3	3	5	4	5	4	3	5	3	5	4	3	5
222		2	20	4	4	4	5	5	1	2	4	4	3	5	3	1	3	4	5	5	5	1	4	4	5	4	4	1	5	1	4	3	4	5	5
223		2	30	5	4	3	5	5	4	3	3	2	1	5	4	5	5	3	5	1	1	3	3	3	5	4	5	4	3	5	3	5	4	3
224	1		22	5	4	3	5	5	4	3	3	2	1	5	4	5	5	3	5	1	1	3	3	3	5	4	5	4	3	5	3	5	4	3	5
225		2	20	5	4	3	5	5	4	3	3	2	1	5	4	5	5	3	5	1	1	3	3	3	5	4	5	4	3	5	3	5	4	3	5
226	1		18	5	4	3	5	5	4	3	3	2	1	5	4	5	5	3	5	1	1	3	3	3	5	4	5	4	3	5	3	5	4	3	5
227		2	18	5	5	5	4	5	3	4	5	4	3	5	5	5	5	3	4	1	4	1	3	1	4	4	4	4	4	5	4	4	4	2	3
228		2	17	3	2	1	5	4	5	3	2	5	4	3	2	5	3	3	2	3	2	1	4	5	5	5	3	1	5	4	3	2	5	5	4
229		2	18	3	3	5	2	5	4	3	5	4	1	3	5	3	5	5	4	2	3	3	3	2	4	4	3	4	4	5	4	5	3	4	5
230		2	18	3	3	2	1	3	1	5	5	5	2	3	4	3	1	3	3	5	4	3	2	2	4	4	4	4	3	5	5	5	3	4	4
231	1		18	5	5	5	5	5	3	3	2	2	1	3	5	5	5	5	5	1	1	2	2	1	5	5	5	5	5	5	4	5	5	4	5
232		2	18	4	4	4	4	4	4	3	3	3	4	3	3	3	3	4	4	3	3	2	3	3	3	3	3	4	3	4	4	4	4	4	4
233		2	18	5	2	1	2	4	4	4	3	2	4	3	4	3	4	3	4	3	5	3	3	4	4	4	4	5	4	5	5	5	5	5	5
234		2	18	5	5	5	5	5	3	3	3	4	1	3	5	3	3	3	5	1	1	3	3	1	4	5	4	4	5	4	5	4	4	4	5
235		2	15	4	3	5	2	1	5	2	4	2	5	4	2	4	1	5	2	4	2	5	2	3	2	4	2	4	2	5	2	5	2	4	2
236	1		20	5	2	4	2	5	1	4	1	4	5	2	5	2	4	3	1	5	3	5	2	4	2	4	2	5	3	5	3	1	5	2	3
237		2	20	1	4	2	5	2	4	1	4	1	5	3	4	2	4	1	5	2	4	2	5	2	4	2	5	2	5	2	4	2	4	1	5
238	1		18	2	3	1	5	2	4	1	5	4	3	5	2	4	1	2	5	2	4	1	5	3	4	2	4	1	5	2	4	1	4	1	4
239	1		16	1	4	2	4	1	5	1	4	3	2	5	2	4	2	4	1	5	2	4	2	4	2	4	2	5	2	4	2	4	2	5	2
240	1		18	5	3	2	5	3	5	3	1	4	2	4	2	5	1	4	2	5	2	4	2	4	2	1	5	1	4	2	4	1	4	2	5
241	1		16	3	1	5	3	4	2	5	3	2	5	2	4	2	5	2	4	2	5	1	4	5	2	4	2	2	5	2	5	1	2	4	2
242		2	18	3	4	5	4	5	5	4	5	4	3	4	5	4	5	5	4	5	4	5	5	5	5	4	3	4	5	4	5	4	3	5	5
243		2	20	4	5	4	5	4	5	3	5	4	5	4	5	5	5	4	3	5	4	4	4	5	2	4	5	4	3	4	5	4	4	5	5
244		2	18	5	4	4	5	5	5	4	4	3	4	5	4	5	5	5	5	4	3	4	5	5	4	4	4	3	4	5	4	4	5	5	5
245		2	17	4	5	4	5	3	3	3	4	5	4	4	4	5	5	5	5	4	5	5	3	5	5	5	5	4	4	3	5	5	5	4	4
246		2	19	4	5	4	5	5	4	4	5	4	5	4	4	4	5	3	5	4	4	5	5	5	3	3	4	5	4	5	5	4	3	5	5
247		2	19	3	4	5	5	4	5	4	5	5	5	4	4	4	5	4	5	5	5	5	5	5	4	5	4	5	4	5	3	4	5	4	5
248		2	20	4	5	4	5	5	4	5	5	5	4	3	4	5	5	4	5	5	5	4	4	4	5	5	4	3	5	5	4	5	3	4	5
249		2	19	4	5	4	5	5	4	5	4	5	4	3	4	5	5	4	5	4	4	5	5	5	5	5	4	4	3	5	4	2	5	4	1
250		2	16	4	5	5	4	4	5	5	4	5	5	5	4	4	5	5	5	4	5	4	4	4	5	5	5	4	5	5	5	5	4	4	3
251		2	22	4	5	4	5	4	5	3	2	3	2	3	4	5	4	5	5	5	5	4	4	4	4	5	3	5	3	5	3	5	4	4	4
252		2	20	4	5	5	4	4	3	4	5	4	5	4	3	3	4	5	4	5	5	4	3	4	5	5	5	4	3	4	5	3	3	4	4
253		2	19	4	5	5	4	5	4	3	5	5	5	4	4	5	4	5	4	5	4	4	5	5	4	5	3	4	5	4	5	5	5	4	4
254	1		18	1	1	4	3	2	5	2	4	2	4	3	4	2	4	3	4	3	2	4	2	4	3	5	5	2	5	2	3	2	4	2	3
255	1		23	3	2	4	2	3	2	4	4	2	3	5	2	4	2	4	2	4	2	4	3	5	2	4	2	5	2	4	2	4	2	4	2
256	1		17	3	1	5	3	2	4	3	3	5	2	3	1	2	3	2	4	5	1	5	3	4	2	3	2	5	2	4	2	4	1	4	2
257		2	21	4	3	4	4	5	1	1	2	3	5	3	5	5	5	5	4	1	1	3	1	3	5	5	4	2	4	5	4	4	4	4	4
258	1		18	5	5	5	5	5	4	4	4	4	1	3	5	4	4	4	5	1	2	1	1	2	5	5	5	5	5	5	5	5	5	5	5
259	1		21	1	4	2	3	2	4	2	3	2	4	2	3	4	1	5	2	4	3	1	4	2	5	2	4	1	4	2	4	2	5	2	4
260	1		16	3	2	1	4	3	5	2	4	2	4	2	1	4	2	5	2	4	2	4	5	2	4	2	4	3	5	2	4	2	4	2	5
261		2	15	5	5	5	5	5	2	1	2	4	1	4	5	5	3	5	5	1	1	3	1	1	5	4	2	2	4	5	4	4	4	4	4
262		2	18	5	5	5	5	5	1	1	3	3	1	3	5	4	2	5	5	1	1	1	1	1	5	5	5	5	5	5	5	5	5	5	5
263		2	18	5	5	5	5	5	1	1	3	3	1	3	5	4	2	5	5	1	1	1	1	1	5	5	5	5	5	5	5	5	5	4	5
264		2	16	5	3	3	4	4	4	3	2	3	4	3	3	3	2	2	3	2	2	2	3	1	4	5	5	5	4	4	4	5	4	3	5
265	1		20	1	3	3	4	3	5	3	5	2	4	2	3	3	2	3	4	3	4	4	4	3	2	2	4	2	3	4	2	4	2	3	4
266	1		17	5	4	5	5	5	5	5	3	3	3	3	1	1	3	5	3	1	1	3	2	2	5	3	3	4	4	3	4	5	5	5	5
267	1		17	5	4	5	5	5	5	5	3	3	1	1	3	5	3	5	5	3	1	1	2	2	5	3	3	4	4	3	4	5	5	5	5
268	1		17	5	4	5	5	5	3	2	3	3	5	5	4	4	3	5	4	4	4	5	3	3	4	5	5	4	4	4	5	5	4	3	5
269		2	18	2	4	5	5	5	5	5	5	4	5	4	4	4	5	5	4	5	5	3	2	2	5	2	5	3	5	3	5	5	5	5	5
270		2	18	5	5	5	5	5	3	4	5	5	1	5	5	3	4	5	5	4	5	5	1	1	5	5	5	5	4	5	4	3	1	4	5
271		2	20	3	4	4	5	5	1	3	3	3	1	4	4	5	5	5	5	1	1	1	3	1	3	5	5	5	4	4	4	5	5	3	5
272	1		22	5	5	5	5	5	5	1	1	1	1	3	2	5	5	3	5	1	1	1	1	3	5	5	5	5	5	5	5	5	5	4	5
273	1		19	5	5	5	5	5	1	1	4	1	1	5	5	3	5	5	5	1	5	1	1	5	5	5	5	5	5	5	5	4	5	3	5
274	1		22	4	4	4	5	5	2	3	3	5	1	3	5	3	3	4	5	3	4	5	1	4	5	5	5	4	5	3	4	5	3	4	5
275		2	18	5	5	5	5	5	4	3	3	4	1	4	5	3	4	5	4	3	2	4	2	3	5	5	5	5	5	3	5	5	4	3	4
276	1		23	5	5	5	5	5	3	3	3	3	1	2	5	5	5	5	5	1	3	3	2	3	5	5	5	5	5	5	5	4	5	5	5
